# Supplementary material for: On the methodological framework of composite index under complex surveys and its application in development of food consumption index for India
Source: Frontiers journal article supplement (doi:10.3389/fams.2023.1274530), 2023-11-17
Supplement: Table_1.docx [file Table_1.docx]

**APPENDIX**

**Table S1: Eigen vector comparison of OLS-PCA and SW-PCA based method on sampled data with respect to PVC-PCA based index on population data**

| **Principal component 1** | | | | | | | |
| --- | --- | --- | --- | --- | --- | --- | --- |
| Variables | PVC-PCA Eigenvectorss on population data | OLS-PCA Eigenvectors on sampled data | | | SW-PCA Eigenvectors on sampled data | | |
| Mean | Mean | Bias | Std Dev | Mean | Bias | Std Dev |
| Y1 | -0.206 | -0.287 | -0.282 | 0.076 | -0.204 | -0.003 | 0.042 |
| Y2 | -0.078 | -0.091 | -0.102 | 0.024 | -0.077 | -0.001 | 0.015 |
| Y3 | -0.969 | -0.910 | -1.203 | 0.234 | -0.953 | -0.016 | 0.172 |
| Y4 | -0.091 | -0.094 | -0.115 | 0.024 | -0.089 | -0.001 | 0.016 |
| Y5 | -0.026 | -0.031 | -0.035 | 0.008 | -0.026 | 0.000 | 0.005 |
| Y6 | -0.024 | -0.041 | -0.035 | 0.012 | -0.023 | 0.000 | 0.006 |
| Y7 | -0.035 | -0.043 | -0.046 | 0.011 | -0.035 | 0.000 | 0.007 |
| Y8 | -0.028 | -0.031 | -0.036 | 0.008 | -0.028 | 0.000 | 0.005 |
| Y9 | -0.016 | -0.019 | -0.021 | 0.005 | -0.015 | 0.000 | 0.003 |
| Y10 | -0.020 | -0.023 | -0.027 | 0.006 | -0.020 | 0.000 | 0.004 |
| Y11 | -0.021 | -0.048 | -0.036 | 0.015 | -0.021 | 0.000 | 0.010 |
| Y12 | -0.027 | -0.031 | -0.035 | 0.008 | -0.027 | 0.000 | 0.005 |
| **Average** | | | **-0.1644** | **0.036** |  | **-0.002** | **0.0242** |
| **Principal component 2** | | | | | | | |
| Variables | PVC-PCA Eigenvectors on population data | OLS-PCA Eigenvectors on sampled data | | | SW-PCA Eigenvectors on sampled data | | |
| Mean | Mean | Bias | Std Dev | Mean | Bias | Std Dev |
| Y1 | 0.959 | 0.931 | 0.954 | 0.005 | 0.958 | 0.001 | 0.004 |
| Y2 | 0.106 | 0.101 | 0.100 | 0.006 | 0.106 | 0.000 | 0.007 |
| Y3 | -0.224 | -0.319 | -0.239 | 0.016 | -0.224 | 0.001 | 0.020 |
| Y4 | 0.034 | 0.026 | 0.030 | 0.005 | 0.034 | 0.000 | 0.005 |
| Y5 | 0.033 | 0.032 | 0.031 | 0.003 | 0.033 | 0.000 | 0.003 |
| Y6 | 0.108 | 0.111 | 0.100 | 0.008 | 0.108 | 0.000 | 0.008 |
| Y7 | 0.062 | 0.060 | 0.059 | 0.003 | 0.062 | 0.000 | 0.003 |
| Y8 | 0.015 | 0.014 | 0.012 | 0.003 | 0.015 | 0.000 | 0.003 |
| Y9 | 0.021 | 0.021 | 0.019 | 0.002 | 0.021 | 0.000 | 0.002 |
| Y10 | 0.016 | 0.016 | 0.014 | 0.002 | 0.016 | 0.000 | 0.002 |
| Y11 | 0.012 | 0.033 | -0.011 | 0.022 | 0.012 | 0.000 | 0.024 |
| Y12 | 0.016 | 0.016 | 0.013 | 0.003 | 0.016 | 0.000 | 0.004 |
| **Average** | | | **0.0902** | **0.0065** |  | **0.0001** | **0.0071** |
| **Principal component 3** | | | | | | | |
| Variables | PVC-PCA Eigenvectors on population data | OLS-PCA Eigenvectors on sampled data | | | SW-PCA Eigenvectors on sampled data | | |
| Mean | Mean | Bias | Std Dev | Mean | Bias | Std Dev |
| Y1 | -0.023 | -0.044 | -0.062 | 0.039 | -0.013 | -0.010 | 0.030 |
| Y2 | 0.004 | 0.002 | -0.008 | 0.011 | 0.000 | 0.003 | 0.013 |
| Y3 | -0.019 | -0.027 | -0.050 | 0.030 | -0.004 | -0.016 | 0.022 |
| Y4 | -0.004 | -0.004 | -0.011 | 0.008 | -0.002 | -0.002 | 0.009 |
| Y5 | 0.002 | 0.002 | -0.002 | 0.005 | 0.000 | 0.002 | 0.005 |
| Y6 | 0.038 | 0.029 | 0.006 | 0.032 | 0.010 | 0.028 | 0.040 |
| Y7 | 0.004 | 0.002 | -0.002 | 0.006 | 0.001 | 0.003 | 0.007 |
| Y8 | 0.017 | 0.013 | 0.003 | 0.013 | 0.005 | 0.012 | 0.017 |
| Y9 | 0.006 | 0.005 | 0.001 | 0.006 | 0.002 | 0.005 | 0.007 |
| Y10 | 0.015 | 0.011 | 0.003 | 0.011 | 0.004 | 0.011 | 0.015 |
| Y11 | 0.998 | 0.716 | 0.306 | 0.692 | 0.275 | 0.723 | 0.959 |
| Y12 | 0.023 | 0.017 | 0.005 | 0.018 | 0.006 | 0.017 | 0.023 |
| **Average** | | | **0.0158** | **0.0726** |  | **0.0647** | **0.0956** |
| **Principal component 4** | | | | | | | |
| Variables | PVC-PCA Eigenvectors on population data | OLS-PCA Eigenvectors on sampled data | | | SW-PCA Eigenvectors on sampled data | | |
| Mean | Mean | Bias | Std Dev | Mean | Bias | Std Dev |
| Y1 | -0.148 | -0.141 | -0.220 | 0.073 | -0.111 | -0.037 | 0.098 |
| Y2 | 0.131 | 0.129 | 0.053 | 0.078 | 0.106 | 0.025 | 0.098 |
| Y3 | -0.024 | -0.030 | -0.041 | 0.016 | -0.019 | -0.005 | 0.017 |
| Y4 | 0.056 | 0.056 | 0.018 | 0.038 | 0.045 | 0.011 | 0.046 |
| Y5 | 0.114 | 0.104 | 0.060 | 0.055 | 0.086 | 0.028 | 0.076 |
| Y6 | 0.938 | 0.820 | 0.500 | 0.438 | 0.690 | 0.248 | 0.631 |
| Y7 | 0.147 | 0.132 | 0.077 | 0.069 | 0.109 | 0.037 | 0.098 |
| Y8 | 0.128 | 0.115 | 0.067 | 0.061 | 0.095 | 0.033 | 0.086 |
| Y9 | 0.089 | 0.080 | 0.047 | 0.042 | 0.067 | 0.022 | 0.059 |
| Y10 | 0.075 | 0.067 | 0.040 | 0.036 | 0.056 | 0.019 | 0.051 |
| Y11 | -0.047 | -0.049 | -0.077 | 0.030 | -0.034 | -0.013 | 0.036 |
| Y12 | 0.106 | 0.096 | 0.054 | 0.051 | 0.079 | 0.027 | 0.072 |
| **Average** | | | **0.0482** | **0.0822** |  | **0.0329** | **0.1139** |
| **Principal component 5** | | | | | | | |
| Variables | PVC-PCA Eigenvectors on population data | OLS-PCA Eigenvectors on sampled data | | | SW-PCA Eigenvectors on sampled data | | |
| Mean | Mean | Bias | Std Dev | Mean | Bias | Std Dev |
| Y1 | -0.120 | -0.121 | -0.142 | 0.022 | -0.112 | -0.008 | 0.043 |
| Y2 | 0.849 | 0.832 | 0.720 | 0.128 | 0.792 | 0.056 | 0.296 |
| Y3 | -0.088 | -0.091 | -0.102 | 0.015 | -0.082 | -0.006 | 0.031 |
| Y4 | 0.389 | 0.382 | 0.326 | 0.062 | 0.363 | 0.026 | 0.137 |
| Y5 | 0.155 | 0.152 | 0.129 | 0.026 | 0.145 | 0.010 | 0.056 |
| Y6 | -0.227 | -0.238 | -0.300 | 0.073 | -0.211 | -0.016 | 0.106 |
| Y7 | 0.102 | 0.100 | 0.080 | 0.022 | 0.096 | 0.006 | 0.040 |
| Y8 | 0.059 | 0.059 | 0.042 | 0.017 | 0.055 | 0.004 | 0.026 |
| Y9 | 0.099 | 0.097 | 0.082 | 0.017 | 0.092 | 0.006 | 0.036 |
| Y10 | 0.042 | 0.041 | 0.031 | 0.012 | 0.040 | 0.003 | 0.018 |
| Y11 | -0.002 | -0.006 | -0.015 | 0.012 | -0.002 | 0.000 | 0.013 |
| Y12 | 0.074 | 0.074 | 0.053 | 0.021 | 0.069 | 0.005 | 0.032 |
| **Average** | | | **0.0753** | **0.0357** |  | **0.0073** | **0.0696** |
| **Principal component 6** | | | | | | | |
| Variables | PVC-PCA Eigenvectors on population data | OLS-PCA Eigenvectors on sampled data | | | SW-PCA Eigenvectors on sampled data | | |
| Mean | Mean | Bias | Std Dev | Mean | Bias | Std Dev |
| Y1 | -0.001 | 0.001 | -0.006 | 0.005 | 0.001 | -0.002 | 0.006 |
| Y2 | -0.407 | 0.022 | -0.811 | 0.405 | 0.021 | -0.428 | 0.404 |
| Y3 | -0.047 | 0.003 | -0.093 | 0.047 | 0.003 | -0.049 | 0.046 |
| Y4 | 0.887 | -0.049 | 0.008 | 0.878 | -0.047 | 0.934 | 0.877 |
| Y5 | 0.100 | -0.008 | -0.002 | 0.102 | -0.008 | 0.108 | 0.104 |
| Y6 | 0.020 | 0.000 | -0.014 | 0.034 | 0.000 | 0.020 | 0.036 |
| Y7 | 0.032 | -0.007 | -0.027 | 0.059 | -0.007 | 0.039 | 0.064 |
| Y8 | -0.119 | 0.003 | -0.242 | 0.123 | 0.003 | -0.122 | 0.127 |
| Y9 | 0.008 | -0.002 | -0.009 | 0.017 | -0.002 | 0.010 | 0.018 |
| Y10 | -0.035 | 0.000 | -0.078 | 0.043 | -0.001 | -0.034 | 0.045 |
| Y11 | 0.008 | 0.000 | -0.003 | 0.011 | 0.000 | 0.008 | 0.011 |
| Y12 | -0.139 | 0.002 | -0.304 | 0.165 | 0.001 | -0.139 | 0.167 |
| **Average** | | | **-0.1317** | **0.1574** |  | **0.0287** | **0.1588** |
| **Principal component 7** | | | | | | | |
| Variables | PVC-PCA Eigenvectors on population data | OLS-PCA Eigenvectors on sampled data | | | SW-PCA Eigenvectors on sampled data | | |
| Mean | Mean | Bias | Std Dev | Mean | Bias | Std Dev |
| Y1 | 0.010 | 0.003 | -0.001 | 0.011 | 0.003 | 0.007 | 0.011 |
| Y2 | 0.256 | 0.099 | 0.011 | 0.245 | 0.102 | 0.154 | 0.238 |
| Y3 | 0.028 | 0.011 | 0.001 | 0.028 | 0.011 | 0.017 | 0.026 |
| Y4 | -0.015 | -0.006 | -0.113 | 0.098 | -0.007 | -0.008 | 0.108 |
| Y5 | -0.210 | -0.077 | -0.405 | 0.195 | -0.081 | -0.129 | 0.193 |
| Y6 | 0.203 | 0.077 | 0.013 | 0.190 | 0.079 | 0.123 | 0.185 |
| Y7 | -0.368 | -0.133 | -0.709 | 0.341 | -0.141 | -0.227 | 0.339 |
| Y8 | -0.309 | -0.115 | -0.595 | 0.286 | -0.120 | -0.188 | 0.284 |
| Y9 | -0.092 | -0.033 | -0.178 | 0.086 | -0.036 | -0.057 | 0.085 |
| Y10 | -0.189 | -0.070 | -0.365 | 0.175 | -0.074 | -0.116 | 0.174 |
| Y11 | 0.020 | 0.008 | -0.001 | 0.021 | 0.008 | 0.012 | 0.019 |
| Y12 | -0.757 | -0.280 | -1.451 | 0.694 | -0.294 | -0.462 | 0.689 |
| **Average** | | | **-0.3161** | **0.1975** |  | **-0.0727** | **0.1961** |
| **Principal component 8** | | | | | | | |
| Variables | PVC-PCA Eigenvectors on population data | OLS-PCA Eigenvectors on sampled data | | | SW-PCA Eigenvectors on sampled data | | |
| Mean | Mean | Bias | Std Dev | Mean | Bias | Std Dev |
| Y1 | -0.030 | 0.002 | -0.060 | 0.030 | 0.004 | -0.034 | 0.030 |
| Y2 | -0.058 | 0.003 | -0.119 | 0.061 | 0.008 | -0.066 | 0.062 |
| Y3 | 0.005 | 0.000 | -0.001 | 0.006 | 0.000 | 0.005 | 0.006 |
| Y4 | -0.154 | 0.006 | -0.312 | 0.158 | 0.018 | -0.172 | 0.156 |
| Y5 | 0.179 | -0.008 | -0.006 | 0.185 | -0.022 | 0.202 | 0.182 |
| Y6 | -0.091 | 0.004 | -0.183 | 0.092 | 0.012 | -0.103 | 0.091 |
| Y7 | 0.813 | -0.038 | 0.011 | 0.803 | -0.104 | 0.917 | 0.796 |
| Y8 | -0.012 | 0.002 | -0.123 | 0.110 | -0.001 | -0.011 | 0.124 |
| Y9 | 0.103 | -0.004 | 0.000 | 0.103 | -0.013 | 0.116 | 0.102 |
| Y10 | 0.051 | -0.003 | -0.013 | 0.065 | -0.007 | 0.058 | 0.067 |
| Y11 | 0.010 | 0.000 | -0.001 | 0.010 | -0.001 | 0.011 | 0.011 |
| Y12 | -0.506 | 0.020 | -1.011 | 0.505 | 0.061 | -0.567 | 0.500 |
| **Average** | | | **-0.1515** | **0.1773** |  | **0.0295** | **0.1772** |
| **Principal component 9** | | | | | | | |
| Variables | PVC-PCA Eigenvectors on population data | OLS-PCA Eigenvectors on sampled data | | | SW-PCA Eigenvectors on sampled data | | |
| Mean | Mean | Bias | Std Dev | Mean | Bias | Std Dev |
| Y1 | -0.008 | 0.000 | -0.017 | 0.009 | -0.001 | -0.007 | 0.009 |
| Y2 | 0.036 | 0.007 | -0.004 | 0.040 | 0.008 | 0.028 | 0.041 |
| Y3 | 0.016 | 0.003 | 0.000 | 0.015 | 0.003 | 0.013 | 0.016 |
| Y4 | -0.097 | -0.015 | -0.192 | 0.095 | -0.017 | -0.080 | 0.100 |
| Y5 | 0.270 | 0.049 | 0.008 | 0.262 | 0.051 | 0.219 | 0.266 |
| Y6 | 0.049 | 0.011 | -0.001 | 0.050 | 0.012 | 0.037 | 0.050 |
| Y7 | 0.116 | 0.006 | -0.040 | 0.156 | 0.007 | 0.108 | 0.163 |
| Y8 | -0.872 | -0.166 | -1.719 | 0.847 | -0.176 | -0.696 | 0.841 |
| Y9 | 0.030 | 0.004 | -0.008 | 0.038 | 0.004 | 0.026 | 0.041 |
| Y10 | -0.218 | -0.043 | -0.433 | 0.215 | -0.047 | -0.172 | 0.215 |
| Y11 | 0.007 | 0.001 | -0.001 | 0.009 | 0.001 | 0.006 | 0.009 |
| Y12 | 0.304 | 0.067 | 0.000 | 0.303 | 0.072 | 0.232 | 0.302 |
| **Average** | | | **-0.2006** | **0.17** |  | **-0.0238** | **0.1711** |
| **Principal component 10** | | | | | | | |
| Variables | PVC-PCA Eigenvectors on population data | OLS-PCA Eigenvectors on sampled data | | | SW-PCA Eigenvectors on sampled data | | |
| Mean | Mean | Bias | Std Dev | Mean | Bias | Std Dev |
| Y1 | -0.009 | -0.001 | -0.018 | 0.009 | -0.001 | -0.008 | 0.009 |
| Y2 | 0.084 | 0.001 | 0.001 | 0.084 | 0.008 | 0.076 | 0.084 |
| Y3 | -0.003 | 0.000 | -0.007 | 0.004 | 0.000 | -0.003 | 0.004 |
| Y4 | 0.122 | 0.001 | 0.000 | 0.122 | 0.010 | 0.112 | 0.122 |
| Y5 | -0.738 | -0.005 | -1.470 | 0.732 | -0.063 | -0.675 | 0.726 |
| Y6 | 0.050 | 0.001 | 0.000 | 0.050 | 0.005 | 0.046 | 0.050 |
| Y7 | 0.386 | 0.001 | 0.001 | 0.385 | 0.031 | 0.354 | 0.380 |
| Y8 | -0.030 | -0.004 | -0.097 | 0.067 | -0.006 | -0.024 | 0.075 |
| Y9 | -0.313 | -0.002 | -0.624 | 0.310 | -0.028 | -0.286 | 0.309 |
| Y10 | -0.377 | 0.006 | -0.767 | 0.389 | -0.025 | -0.352 | 0.396 |
| Y11 | 0.002 | 0.000 | -0.002 | 0.004 | 0.000 | 0.002 | 0.004 |
| Y12 | 0.202 | 0.002 | 0.002 | 0.199 | 0.018 | 0.184 | 0.200 |
| **Average** | | | **-0.2484** | **0.1963** |  | **-0.0479** | **0.1966** |
| **Principal component 11** | | | | | | | |
| Variables | PVC-PCA Eigenvectors on population data | OLS-PCA Eigenvectors on sampled data | | | SW-PCA Eigenvectors on sampled data | | |
| Mean | Mean | Bias | Std Dev | Mean | Bias | Std Dev |
| Y1 | -0.006 | -0.001 | -0.012 | 0.006 | -0.001 | -0.005 | 0.006 |
| Y2 | 0.029 | 0.006 | -0.003 | 0.032 | 0.004 | 0.025 | 0.033 |
| Y3 | -0.005 | -0.001 | -0.011 | 0.006 | -0.001 | -0.005 | 0.006 |
| Y4 | 0.044 | 0.008 | -0.005 | 0.049 | 0.006 | 0.037 | 0.050 |
| Y5 | -0.347 | -0.064 | -0.701 | 0.354 | -0.049 | -0.298 | 0.359 |
| Y6 | 0.010 | 0.002 | -0.004 | 0.014 | 0.002 | 0.008 | 0.015 |
| Y7 | 0.048 | 0.011 | -0.025 | 0.074 | 0.010 | 0.038 | 0.081 |
| Y8 | -0.322 | -0.056 | -0.636 | 0.314 | -0.040 | -0.283 | 0.318 |
| Y9 | -0.107 | -0.020 | -0.221 | 0.114 | -0.016 | -0.090 | 0.120 |
| Y10 | 0.871 | 0.147 | 0.020 | 0.851 | 0.099 | 0.772 | 0.854 |
| Y11 | -0.007 | -0.001 | -0.014 | 0.007 | -0.001 | -0.006 | 0.007 |
| Y12 | 0.011 | 0.003 | -0.025 | 0.035 | 0.005 | 0.006 | 0.040 |
| **Average** | | | **-0.1363** | **0.1546** |  | **0.0166** | **0.1575** |
| **Principal component 12** | | | | | | | |
| Variables | PVC-PCA Eigenvectors on population data | OLS-PCA Eigenvectors on sampled data | | | SW-PCA Eigenvectors on sampled data | | |
| Mean | Mean | Bias | Std Dev | Mean | Bias | Std Dev |
| Y1 | -0.002 | -0.001 | -0.005 | 0.003 | -0.001 | -0.001 | 0.003 |
| Y2 | 0.041 | 0.019 | 0.004 | 0.037 | 0.018 | 0.022 | 0.037 |
| Y3 | -0.001 | 0.000 | -0.003 | 0.002 | 0.000 | -0.001 | 0.002 |
| Y4 | -0.008 | -0.003 | -0.020 | 0.011 | -0.004 | -0.005 | 0.013 |
| Y5 | 0.370 | 0.166 | 0.040 | 0.330 | 0.163 | 0.207 | 0.333 |
| Y6 | 0.022 | 0.010 | 0.002 | 0.020 | 0.010 | 0.012 | 0.021 |
| Y7 | 0.022 | 0.010 | -0.002 | 0.024 | 0.010 | 0.011 | 0.026 |
| Y8 | 0.067 | 0.030 | 0.005 | 0.062 | 0.029 | 0.038 | 0.064 |
| Y9 | -0.923 | -0.418 | -1.745 | 0.822 | -0.408 | -0.515 | 0.826 |
| Y10 | 0.057 | 0.026 | -0.003 | 0.060 | 0.025 | 0.033 | 0.061 |
| Y11 | 0.002 | 0.001 | -0.001 | 0.003 | 0.001 | 0.001 | 0.003 |
| Y12 | -0.023 | -0.010 | -0.047 | 0.024 | -0.010 | -0.013 | 0.025 |
| **Average** | | | **-0.1479** | **0.1166** |  | **-0.0175** | **0.1177** |

**Table S2: FCI scores and ranks of the states of India using OLS-PCA and SW-PCA based Index**

| State | OLS-PCA | | SW-PCA | |
| --- | --- | --- | --- | --- |
| FCI | Rank | FCI | Rank |
| Jammu & Kashmir | 0.611 | 15 | 0.694 | 14 |
| Himachal Pradesh | 0.276 | 33 | 0.410 | 31 |
| Punjab | 0.322 | 30 | 0.530 | 21 |
| Chandigarh | 0.822 | 4 | 1.000 | 1 |
| Uttarakhand | 0.675 | 10 | 0.575 | 20 |
| Haryana | 0.771 | 7 | 0.915 | 6 |
| Delhi | 0.574 | 20 | 0.847 | 9 |
| Rajasthan | 0.983 | 2 | 0.977 | 2 |
| Uttar Pradesh | 0.722 | 9 | 0.914 | 7 |
| Bihar | 0.379 | 28 | 0.619 | 17 |
| Sikkim | 0.150 | 34 | 0.366 | 32 |
| Arunachal Pradesh | 0.537 | 21 | 0.500 | 26 |
| Nagaland | 0.282 | 32 | 0.526 | 23 |
| Manipur | 0.395 | 27 | 0.456 | 30 |
| Mizoram | 0.639 | 12 | 0.829 | 11 |
| Tripura | 0.594 | 17 | 0.837 | 10 |
| Meghalaya | 0.497 | 22 | 0.528 | 22 |
| Assam | 0.420 | 25 | 0.688 | 15 |
| West Bengal | 0.440 | 24 | 0.480 | 28 |
| Jharkhand | 0.607 | 16 | 0.498 | 27 |
| Orissa | 0.487 | 23 | 0.524 | 25 |
| Chhattisgarh | 0.781 | 6 | 0.937 | 4 |
| Madhya Pradesh | 0.401 | 26 | 0.476 | 29 |
| Gujarat | 0.819 | 5 | 0.669 | 16 |
| Daman & Diu | 0.977 | 3 | 0.917 | 5 |
| Dadra & Nagar Haveli | 1.000 | 1 | 0.949 | 3 |
| Maharashtra | 0.737 | 8 | 0.862 | 8 |
| Andhra Pradesh | 0.624 | 13 | 0.597 | 18 |
| Karnataka | 0.612 | 14 | 0.525 | 24 |
| Goa | 0.000 | 35 | 0.000 | 35 |
| Lakshadweep | 0.322 | 31 | 0.298 | 33 |
| Kerala | 0.582 | 19 | 0.585 | 19 |
| Tamil Nadu | 0.372 | 29 | 0.166 | 34 |
| Puducherry | 0.660 | 11 | 0.698 | 13 |
| Andaman & Nicobar Islands | 0.593 | 18 | 0.801 | 12 |

**Table S3: Per household total consumption of various items (in Rs.) and their ranks for different states of India**

| **State** | **Total consumption**  **(Rs.)** | **Rank**  **(*Vi)*** |
| --- | --- | --- |
| Jammu & Kashmir | 481.32 | 18 |
| Himachal Pradesh | 602.33 | 5 |
| Punjab | 664.25 | 3 |
| Chandigarh | 714.66 | 2 |
| Uttarakhand | 559.99 | 10 |
| Haryana | 842.47 | 1 |
| Delhi | 613.99 | 4 |
| Rajasthan | 550.65 | 12 |
| Uttar Pradesh | 423.62 | 23 |
| Bihar | 384.48 | 29 |
| Sikkim | 428.39 | 22 |
| Arunachal Pradesh | 419.46 | 24 |
| Nagaland | 379.10 | 32 |
| Manipur | 405.43 | 26 |
| Mizoram | 474.79 | 19 |
| Tripura | 392.63 | 27 |
| Meghalaya | 381.60 | 30 |
| Assam | 384.56 | 28 |
| West Bengal | 441.07 | 21 |
| Jharkhand | 381.51 | 31 |
| Orissa | 354.69 | 35 |
| Chhattisgarh | 357.84 | 34 |
| Madhya Pradesh | 408.21 | 25 |
| Gujarat | 556.60 | 11 |
| Daman & Diu | 367.26 | 33 |
| Dadra & Nagar Haveli | 494.69 | 16 |
| Maharashtra | 533.41 | 13 |
| Andhra Pradesh | 516.67 | 15 |
| Karnataka | 458.82 | 20 |
| Goa | 599.18 | 6 |
| Lakshadweep | 564.45 | 9 |
| Kerala | 517.25 | 14 |
| Tamil Nadu | 483.21 | 17 |
| Puducherry | 582.86 | 8 |
| Andaman & Nicobar Islands | 596.60 | 7 |

**Table S4: Average daily intake per capita in 2011-12 and their ranks for major States of India**

| **State** | **Calories** | **Protein (gm)** | **Rank w.r.t**  **Calories (*Vi)*** | **Rank w.r.t**  **Protein (*Vi)*** |
| --- | --- | --- | --- | --- |
| Andhra Pradesh | 2323 | 60 | 4 | 9 |
| Assam | 2140 | 55 | 15 | 13 |
| Bihar | 2206 | 62 | 7 | 5 |
| Chhattisgarh | 2183.5 | 54 | 10 | 17 |
| Gujarat | 2089 | 55 | 16 | 14 |
| Haryana | 2442 | 71 | 1 | 1 |
| Jharkhand | 2156.5 | 58 | 14 | 11 |
| Karnataka | 2204.5 | 58 | 8 | 10 |
| Kerala | 2180 | 62 | 11 | 6 |
| Madhya Pradesh | 2221.5 | 64 | 6 | 4 |
| Maharashtra | 2243.5 | 61 | 5 | 8 |
| Odisha | 2203 | 55 | 9 | 15 |
| Punjab | 2391 | 67 | 2 | 3 |
| Rajasthan | 2364 | 69 | 3 | 2 |
| Tamil Nadu | 2082 | 55 | 17 | 16 |
| Uttar Pradesh | 2172 | 62 | 12 | 7 |
| West Bengal | 2164.5 | 57 | 13 | 12 |

Source: NSSO report 68th round
